# Supplementary material for: Novel 5-fluorouracil complexes of Zn(ii) with pyridine-based ligands as potential anticancer agents
Source: Royal Society of Chemistry journal article supplement (doi:10.1039/d1dt04070g), 2022-01-01
Supplement: d1dt04070g1.pdf [file d1dt04070g1.pdf]

## Electronic Supplementary Information (ESI)

### Novel 5-fluorouracil complexes of Zn(II) with pyridine-based ligands as potential anticancer agents

Ceyda Içsel,<sup>\*a</sup> Veysel T. Yılmaz,<sup>a</sup> Muhittin Aygun,<sup>b</sup> Merve Erkisa<sup>c</sup> and Engin Ulukaya<sup>c</sup>

<sup>a</sup> Department of Chemistry, Faculty of Arts and Sciences, Uludag University, 16059 Bursa, Turkey.

<sup>b</sup> Department of Physics, Faculty of Sciences, Dokuz Eylül University, 35210 İzmir, Turkey

<sup>c</sup> Molecular Cancer Research Center (ISUMKAM), İstinye University, 34010 İstanbul, Turkey

Corresponding Author:

Assoc. Prof. Dr. Ceyda Içsel  
Department of Chemistry  
Faculty of Arts and Sciences  
Bursa Uludag University  
16059 Bursa, Turkey

E-mail: cydicisel@uludag.edu.tr

**Table S1.** Selected bond lengths (Å) and angles (°) for the Zn(II) complexes.

|                        | <b>1</b> | <b>2</b> | <b>3</b>   | <b>4</b>   |
|------------------------|----------|----------|------------|------------|
| Zn1–N1                 | 2.070(5) | 2.097(6) | 2.146(3)   | 2.236(3)   |
| Zn1–N2                 | 1.978(5) | 2.082(6) | 2.141(3)   | 2.087(3)   |
| Zn1–N3                 | -        | 1.973(5) | 2.142(3)   | 2.188(3)   |
| Zn1–N4                 | -        | -        | 2.037(2)   | 2.032(3)   |
| Zn1–N5                 | -        | 1.955(5) | -          | -          |
| Zn1–N6                 | -        | -        | 2.068(2)   | 2.039(3)   |
| N1–Zn1–N1 <sup>i</sup> | 80.7(3)  | -        | -          | -          |
| N1–Zn1–N2              | 116.8(2) | 79.9(2)  | 77.06(10)  | 74.15(11)  |
| N2–Zn1–N1 <sup>i</sup> | 113.7(2) | -        | -          | -          |
| N2–Zn1–N2 <sup>i</sup> | 112.0(3) | -        | -          | -          |
| N1–Zn1–N3              | -        | 109.9(2) | 149.60(10) | 149.18(11) |
| N1–Zn1–N4              | -        | -        | 104.29(10) | 92.96(12)  |
| N1–Zn1–N5              | -        | 116.5(2) | -          | -          |
| N1–Zn1–N6              | -        | -        | 90.92(10)  | 99.68(11)  |
| N2–Zn1–N3              | -        | 111.4(2) | 77.94(10)  | 75.86(11)  |
| N2–Zn1–N4              | -        | -        | 110.09(12) | 128.21(11) |
| N2–Zn1–N5              | -        | 117.6(2) | -          | -          |
| N2–Zn1–N6              | -        | -        | 131.89(11) | 112.39(11) |
| N3–Zn1–N5              | -        | 116.2(2) | -          | -          |
| N3–Zn1–N4              | -        | -        | 100.33(9)  | 100.06(12) |
| N3–Zn1–N6              | -        | -        | 93.05(10)  | 98.08(11)  |
| N4–Zn1–N6              | -        | -        | 118.02(10) | 119.23(11) |

Symmetry code (i):  $-x+1, y, -z+1/2$ .

**Table S2.** Crystallographic data and structure refinement for the Zn(II) complexes.

|                                                              | <b>1</b>                                                                        | <b>2</b>                                                                        | <b>4</b>                                                                        | <b>5</b>                                                                        |
|--------------------------------------------------------------|---------------------------------------------------------------------------------|---------------------------------------------------------------------------------|---------------------------------------------------------------------------------|---------------------------------------------------------------------------------|
| empirical formula                                            | C <sub>18</sub> H <sub>12</sub> F <sub>2</sub> N <sub>6</sub> O <sub>4</sub> Zn | C <sub>20</sub> H <sub>12</sub> F <sub>2</sub> N <sub>6</sub> O <sub>4</sub> Zn | C <sub>20</sub> H <sub>21</sub> F <sub>2</sub> N <sub>7</sub> O <sub>6</sub> Zn | C <sub>23</sub> H <sub>17</sub> F <sub>2</sub> N <sub>7</sub> O <sub>5</sub> Zn |
| formula weight                                               | 479.71                                                                          | 503.73                                                                          | 558.81                                                                          | 574.80                                                                          |
| crystal system                                               | monoclinic                                                                      | triclinic                                                                       | triclinic                                                                       | triclinic                                                                       |
| space group                                                  | <i>C</i> <sub>2</sub> / <i>c</i>                                                | <i>P</i> $\bar{1}$                                                              | <i>P</i> $\bar{1}$                                                              | <i>P</i> $\bar{1}$                                                              |
| <i>a</i> , Å                                                 | 16.103(3)                                                                       | 8.9142(19)                                                                      | 9.5983(4)                                                                       | 9.3416(12)                                                                      |
| <i>b</i> , Å                                                 | 8.1870(11)                                                                      | 8.956(2)                                                                        | 11.3429(6)                                                                      | 11.2656(15)                                                                     |
| <i>c</i> , Å                                                 | 15.934(3)                                                                       | 13.328(3)                                                                       | 12.5297(6)                                                                      | 12.8923(17)                                                                     |
| $\alpha$ , deg                                               | 90                                                                              | 81.183(19)                                                                      | 105.715(4)                                                                      | 107.595(12)                                                                     |
| $\beta$ , deg                                                | 111.98(2)                                                                       | 73.210(19)                                                                      | 95.658(4)                                                                       | 107.564(12)                                                                     |
| $\gamma$ , deg                                               | 90                                                                              | 67.59(2)                                                                        | 110.128(4)                                                                      | 102.307(11)                                                                     |
| <i>V</i> , Å <sup>3</sup>                                    | 1948.1(7)                                                                       | 940.6(4)                                                                        | 1204.87(11)                                                                     | 1161.8(3)                                                                       |
| <i>T</i> , K                                                 | 150.01(10)                                                                      | 228(2)                                                                          | 293(2)                                                                          | 293(2)                                                                          |
| <i>Z</i>                                                     | 4                                                                               | 2                                                                               | 2                                                                               | 2                                                                               |
| $\rho_{\text{calc}}$ (g cm <sup>-3</sup> )                   | 1.636                                                                           | 1.779                                                                           | 1.540                                                                           | 1.643                                                                           |
| $\mu$ (mm <sup>-1</sup> )                                    | 1.319                                                                           | 1.371                                                                           | 1.085                                                                           | 1.125                                                                           |
| <i>F</i> (000)                                               | 968                                                                             | 508                                                                             | 572                                                                             | 584                                                                             |
| $\theta$ (°)                                                 | 3.371-25.674                                                                    | 2.848-25.026                                                                    | 3.065-25.679                                                                    | 3.056-25.680                                                                    |
| collected refls                                              | 3449                                                                            | 5757                                                                            | 7161                                                                            | 8765                                                                            |
| <i>R</i> <sub>int</sub>                                      | 0.1099                                                                          | 0.067                                                                           | 0.0212                                                                          | 0.0295                                                                          |
| data/ parameters                                             | 1758 /141                                                                       | 3319/298                                                                        | 4536/335                                                                        | 4402/346                                                                        |
| goodness-of-fit                                              | 1.010                                                                           | 1.009                                                                           | 1.031                                                                           | 1.065                                                                           |
| <i>R</i> <sub>1</sub> [ <i>I</i> > 2 $\sigma$ ( <i>I</i> )]  | 0.0639                                                                          | 0.0738                                                                          | 0.0430                                                                          | 0.047                                                                           |
| <i>R</i> <sub>1</sub> (all data)                             | 0.1458                                                                          | 0.0152                                                                          | 0.0613                                                                          | 0.678                                                                           |
| <i>wR</i> <sub>2</sub> [ <i>I</i> > 2 $\sigma$ ( <i>I</i> )] | 0.1178                                                                          | 0.1082                                                                          | 0.0855                                                                          | 0.1054                                                                          |
| <i>wR</i> <sub>2</sub> (all data)                            | 0.1545                                                                          | 0.1357                                                                          | 0.0939                                                                          | 0.1173                                                                          |
| CCDC number                                                  | 2124448                                                                         | 2124449                                                                         | 2124451                                                                         | 2124450                                                                         |

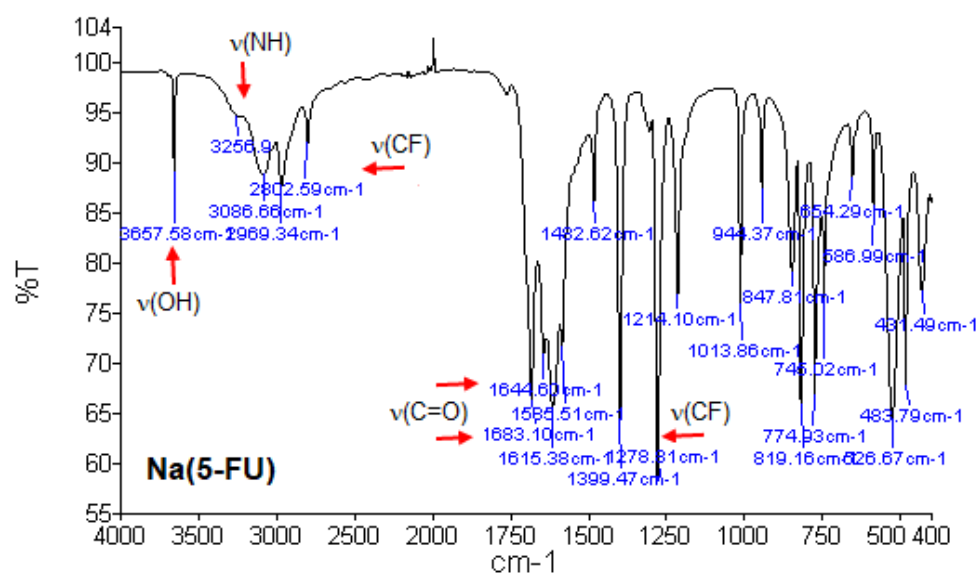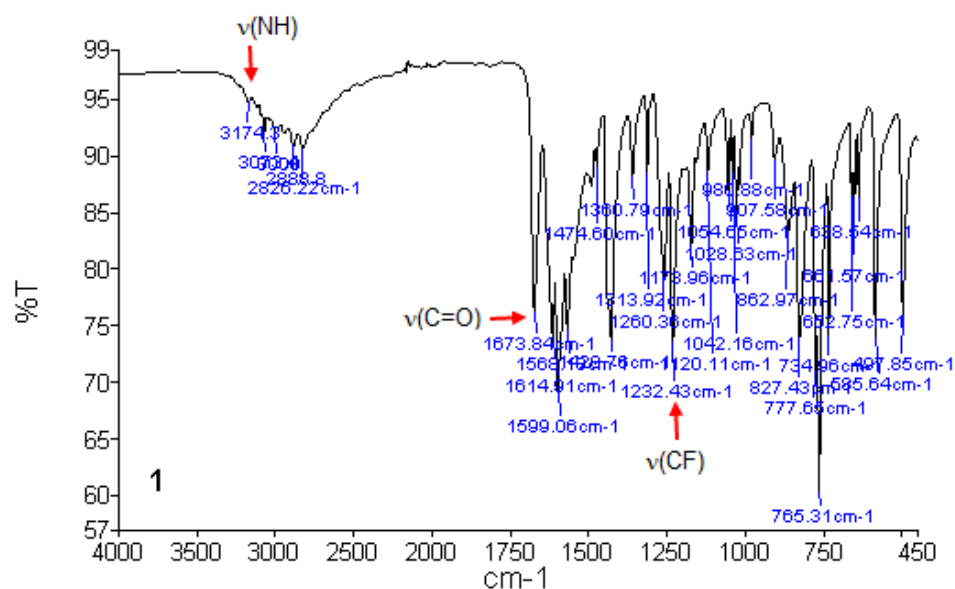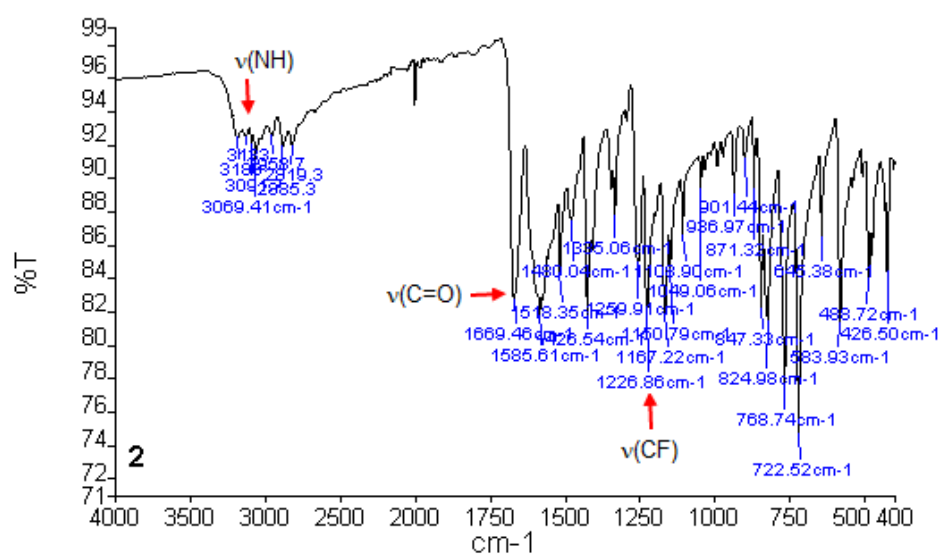

Fig. S1 (continued)

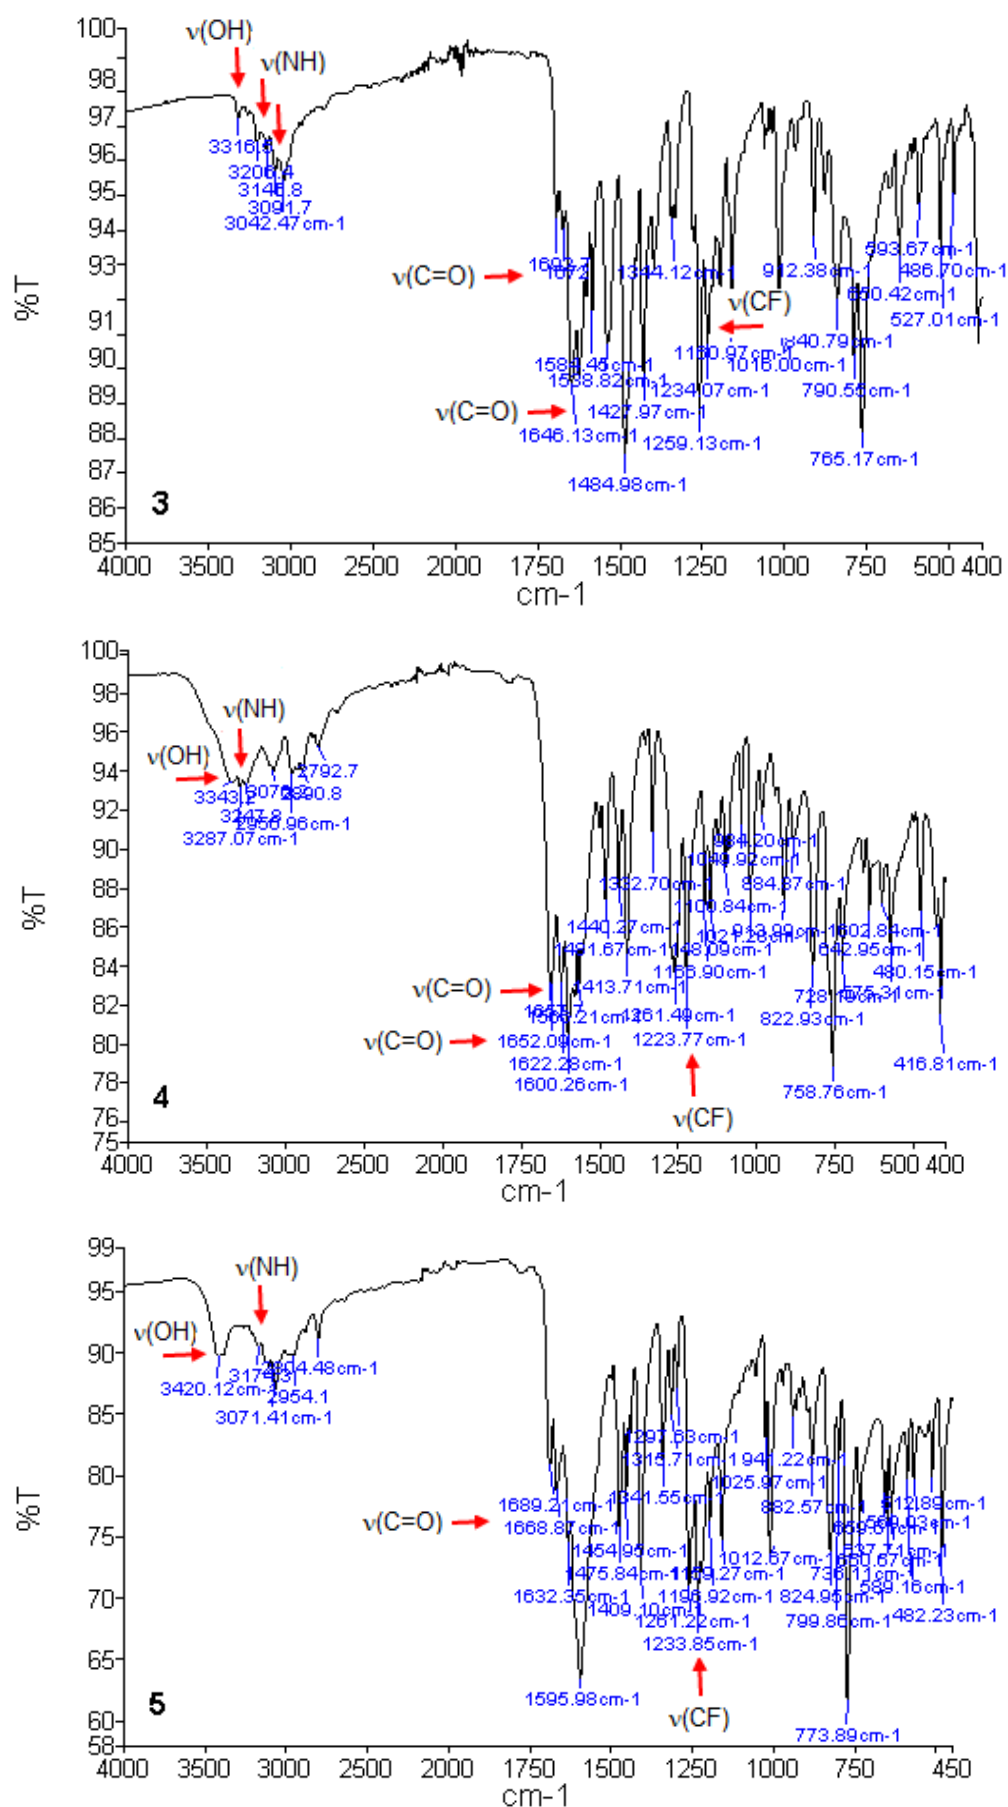

**Fig. S1.** IR spectra of Na(5-FU)·H<sub>2</sub>O and 1–5 in the solid state.

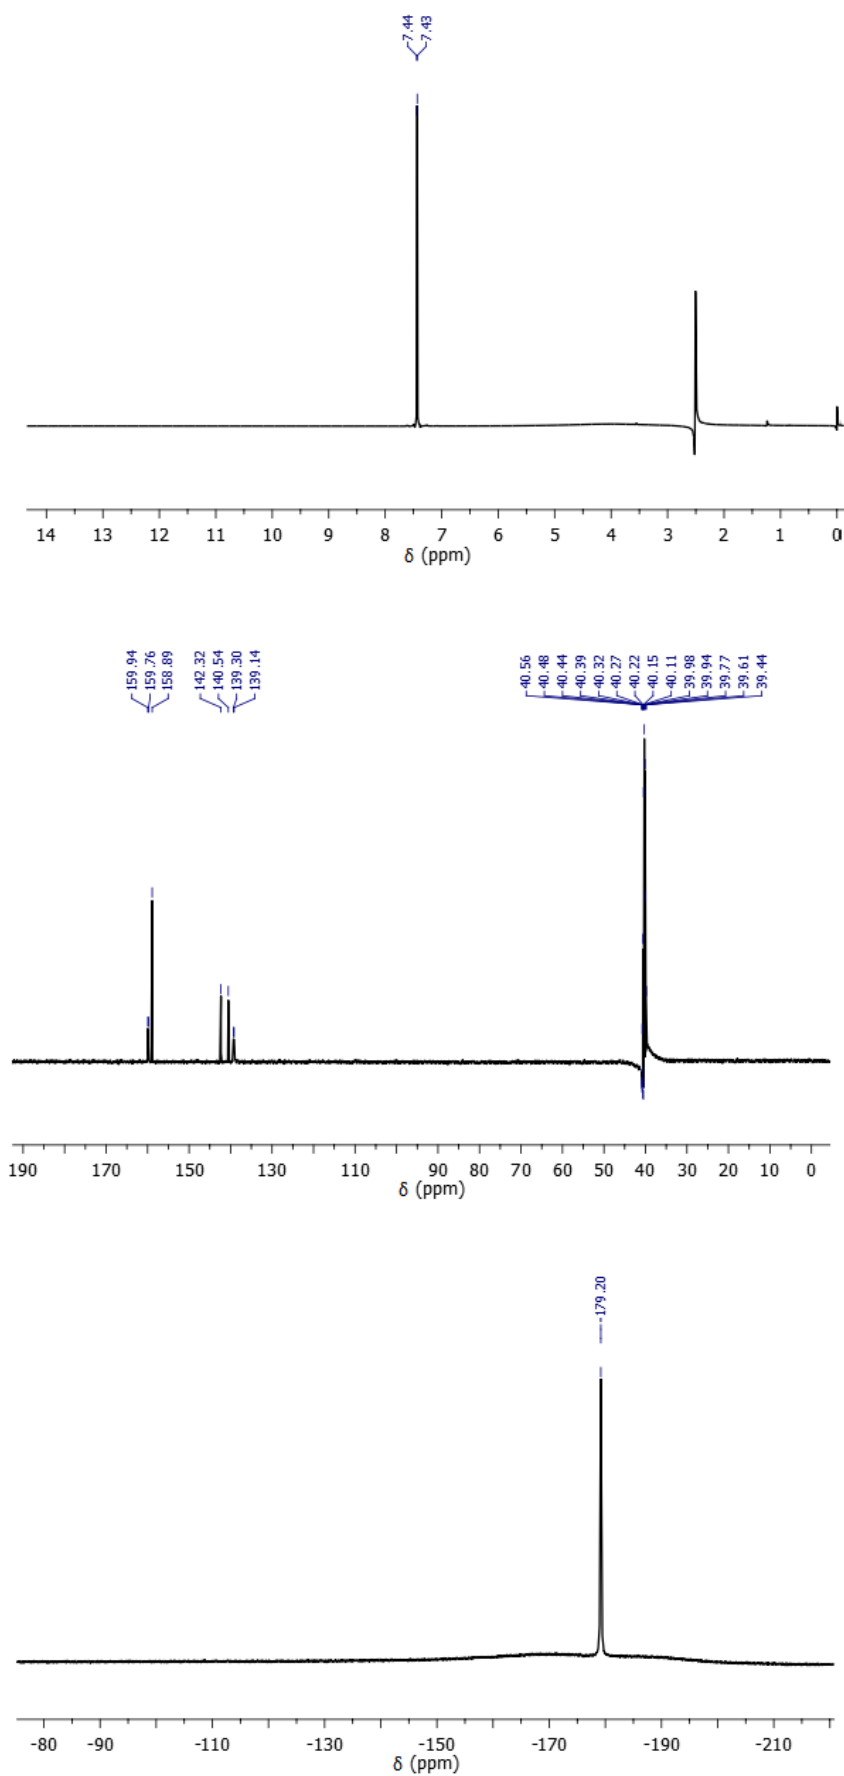

**Fig. S2.** <sup>1</sup>H, <sup>13</sup>C and <sup>19</sup>F spectra of Na(5-FU)·H<sub>2</sub>O in DMSO-*d*<sub>6</sub>.

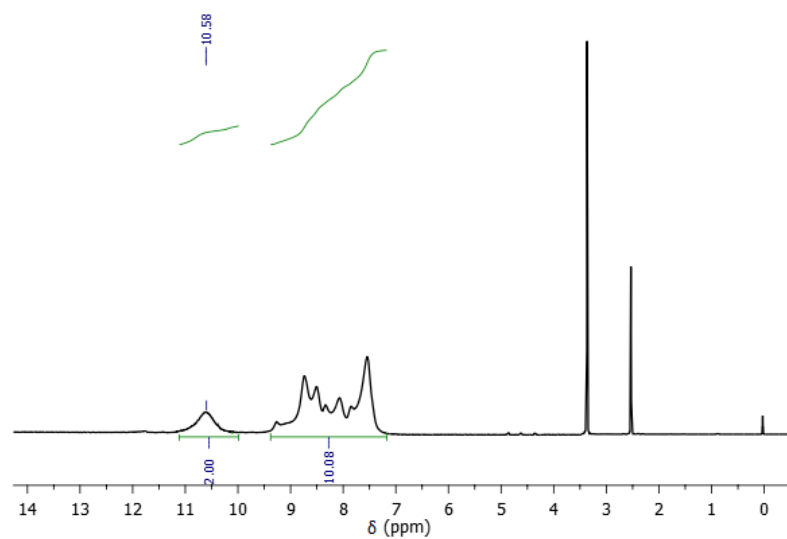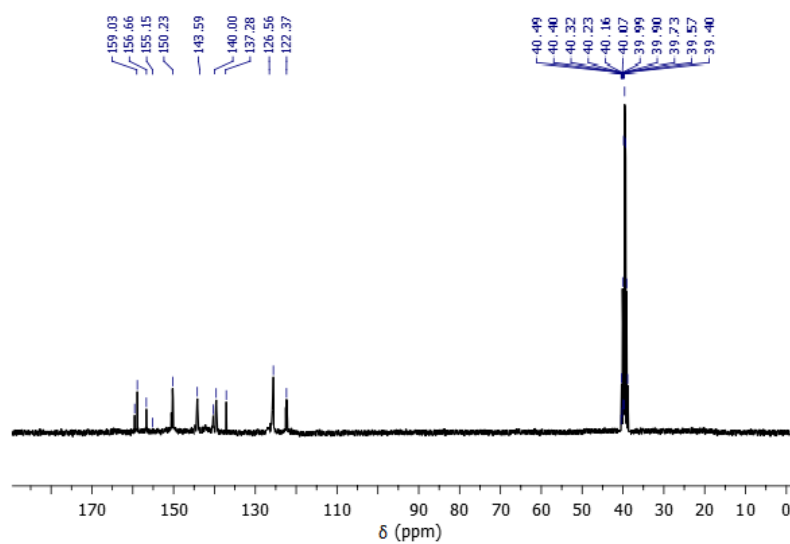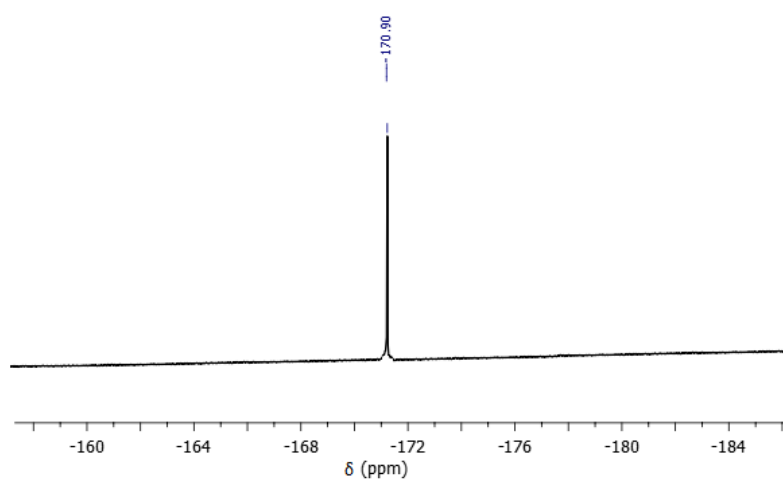

**Fig. S3.**  $^1\text{H}$ ,  $^{13}\text{C}$  and  $^{19}\text{F}$  spectra of **1** in  $\text{DMSO}-d_6$ .

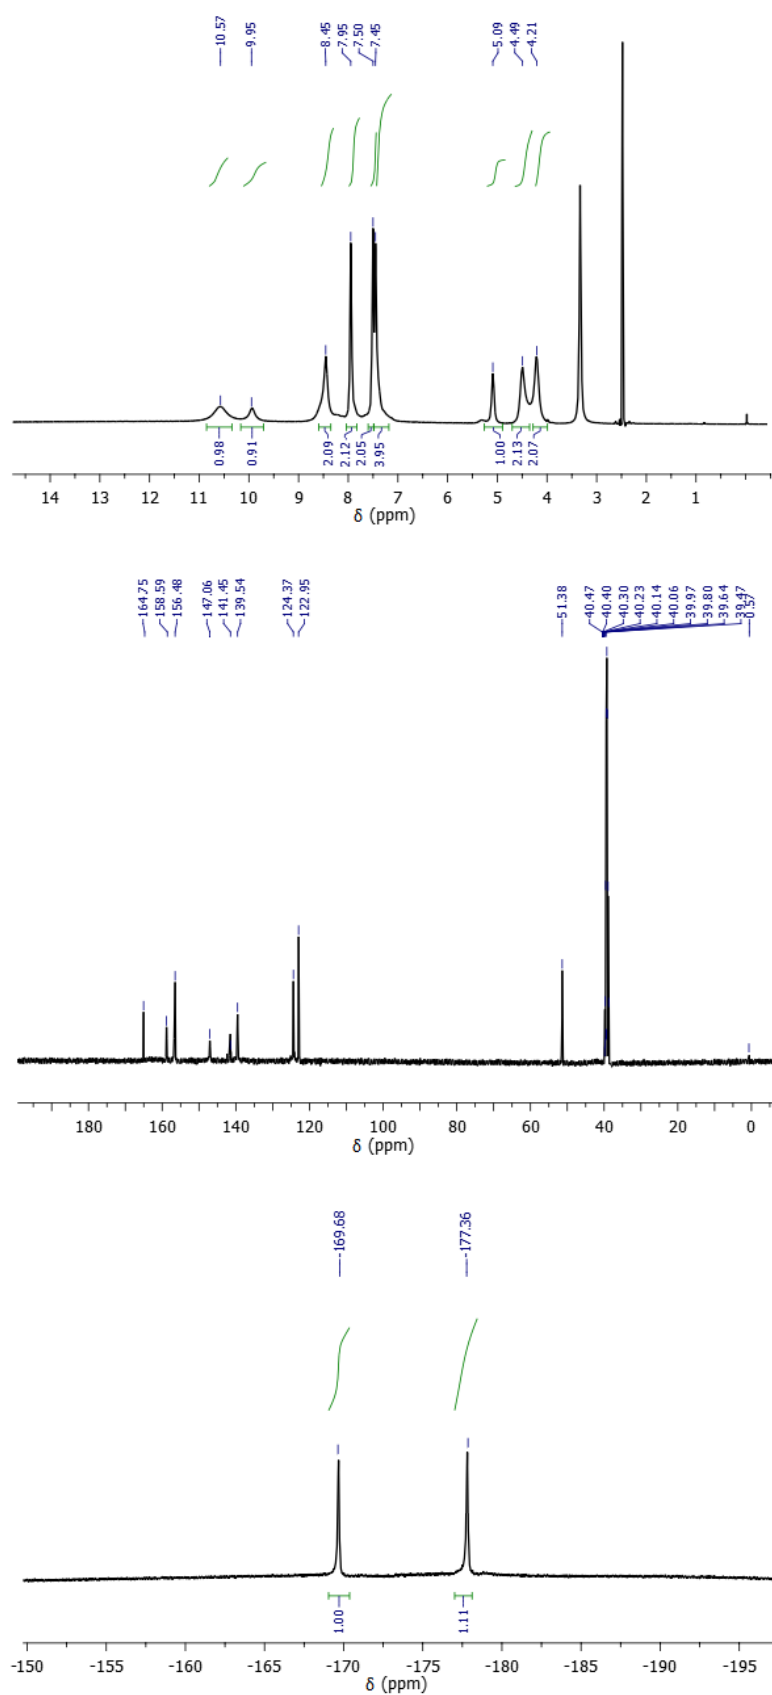

**Fig. S4.**  $^1\text{H}$ ,  $^{13}\text{C}$  and  $^{19}\text{F}$  spectra of **4** in  $\text{DMSO}-d_6$ .



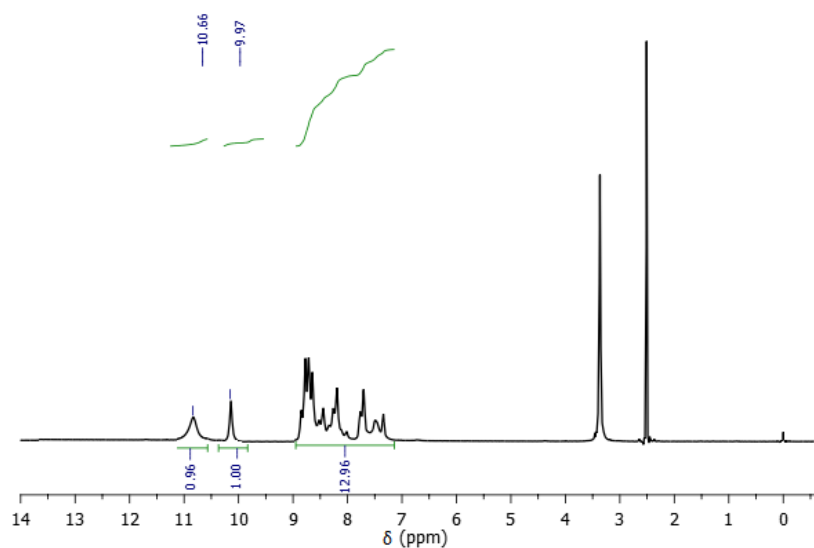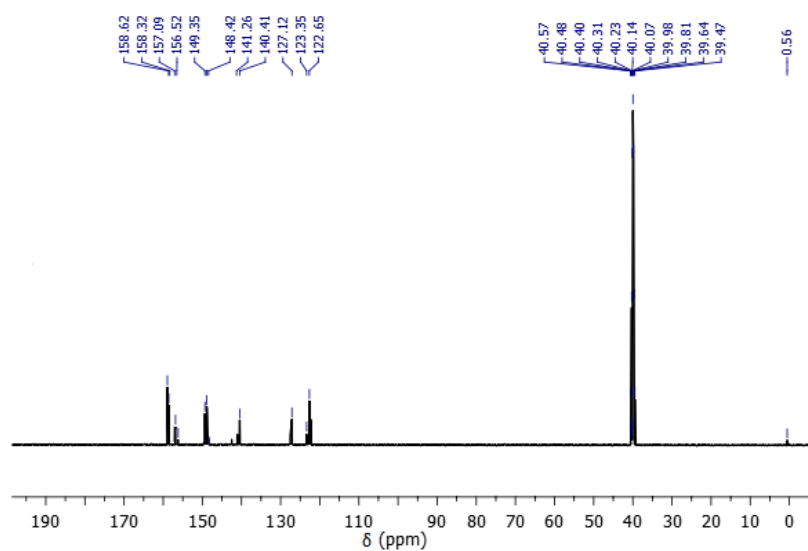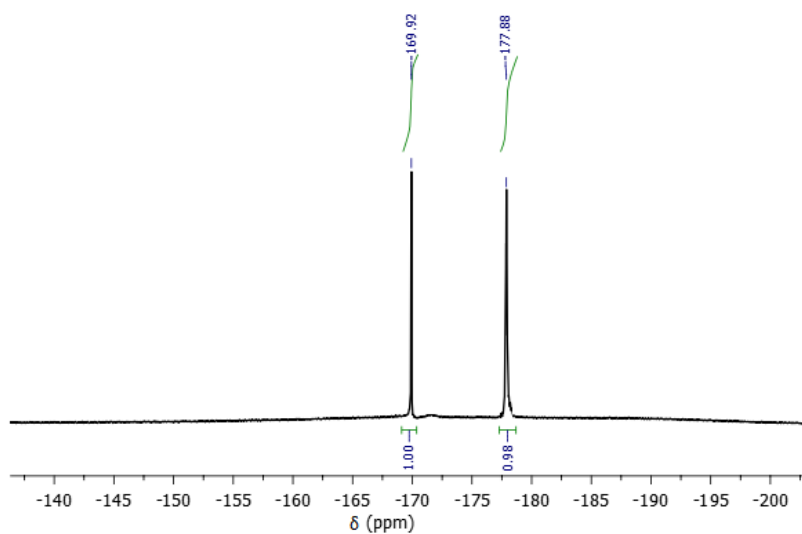

**Fig. S5.**  $^1\text{H}$ ,  $^{13}\text{C}$  and  $^{19}\text{F}$  spectra of **5** in  $\text{DMSO}-d_6$ .

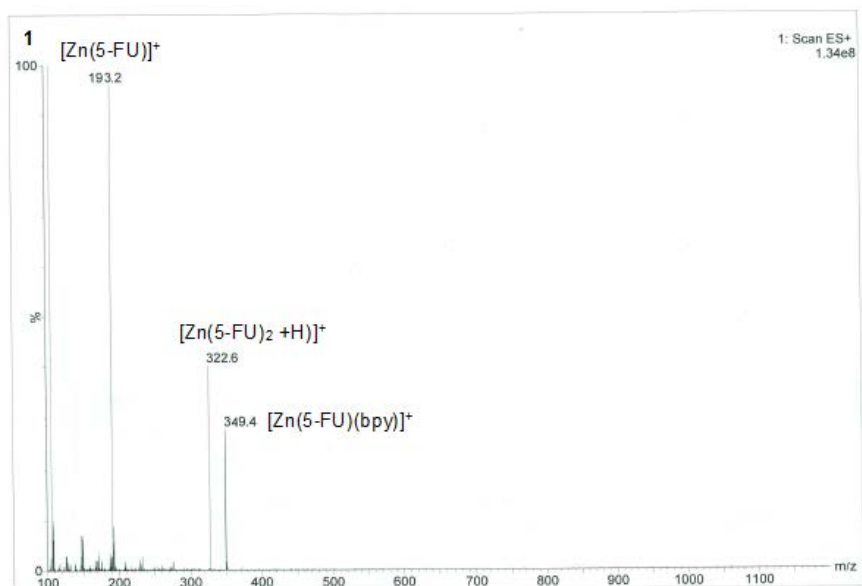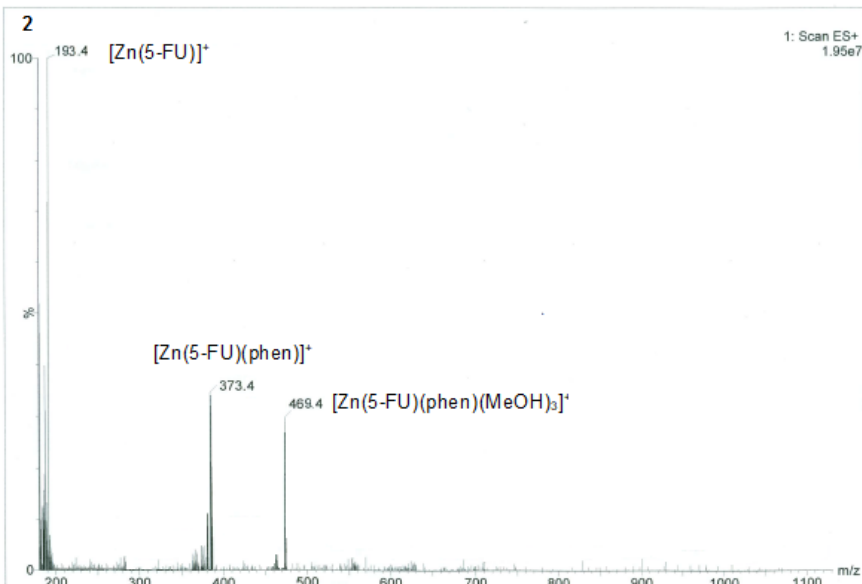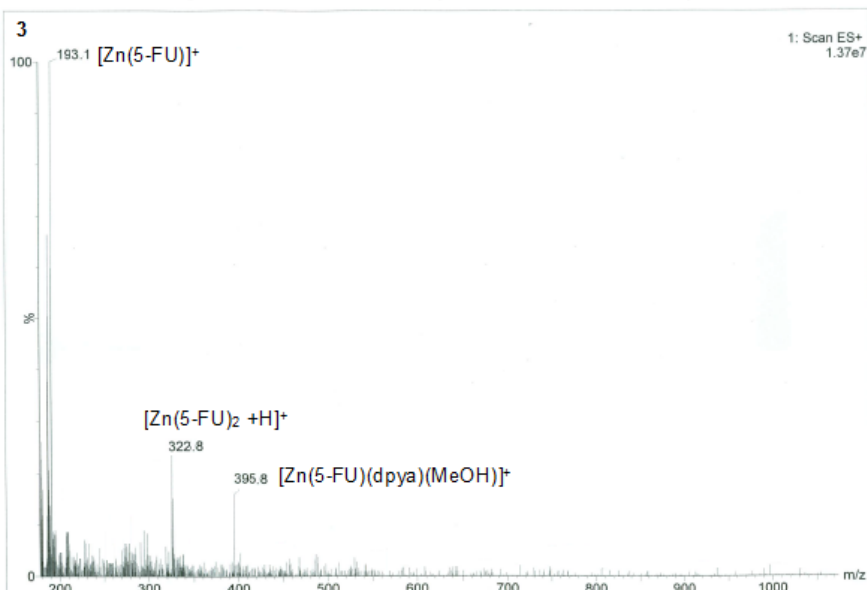

**Fig. S6 (Continued)**

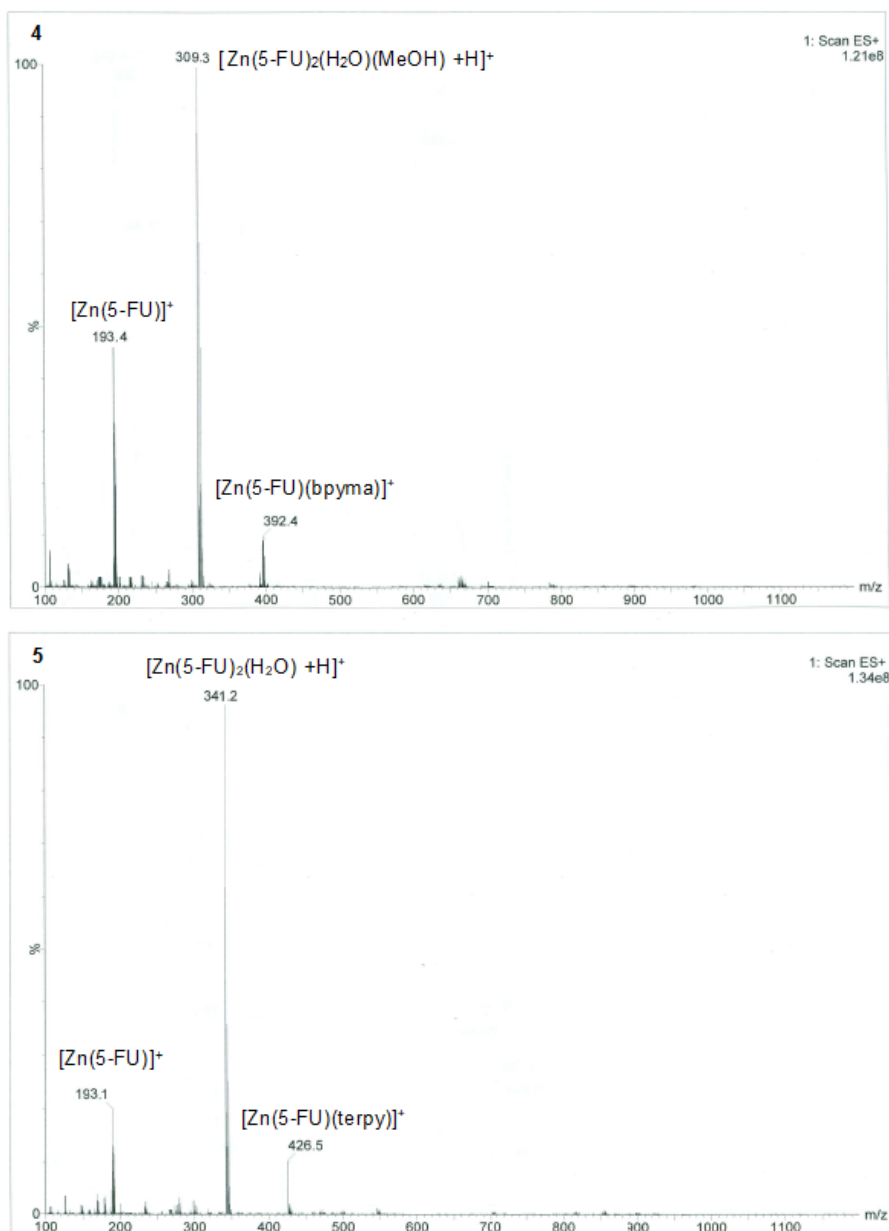

**Fig. S6.** ESI-MS spectra of **1–5**.

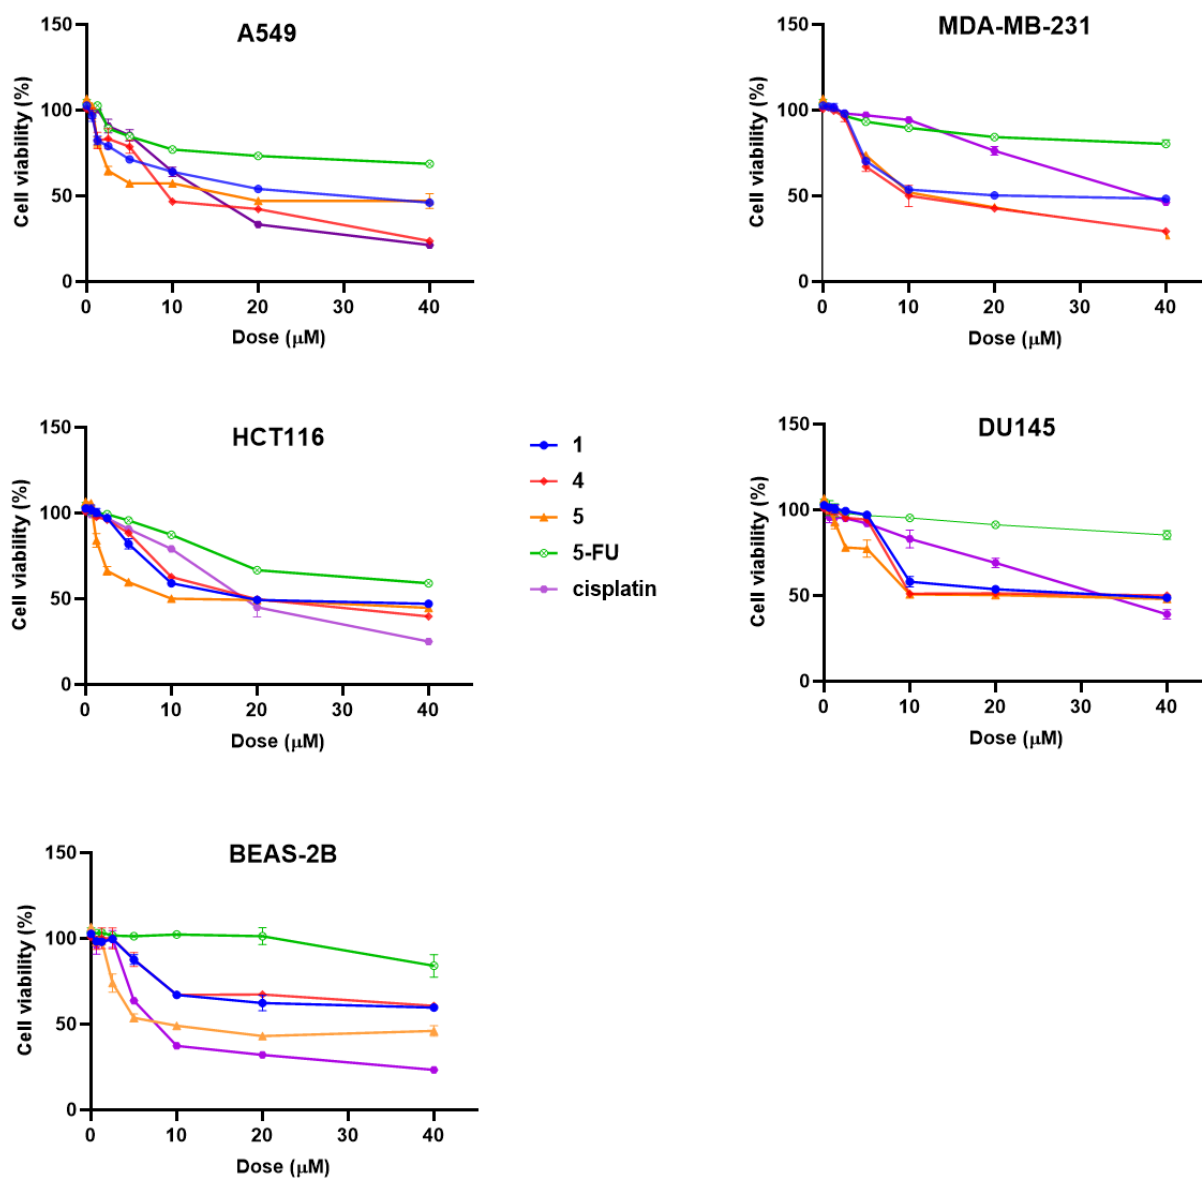

**Fig. S7a.** The dose-response graphics for **1**, **4**, **5**, 5-FU and cisplatin obtained from SRB assay, showing the effect of the complexes on the growth of the cell lines after 48 h of treatment. Results are represented as mean  $\pm$  standard deviation ( $n = 3$ ).

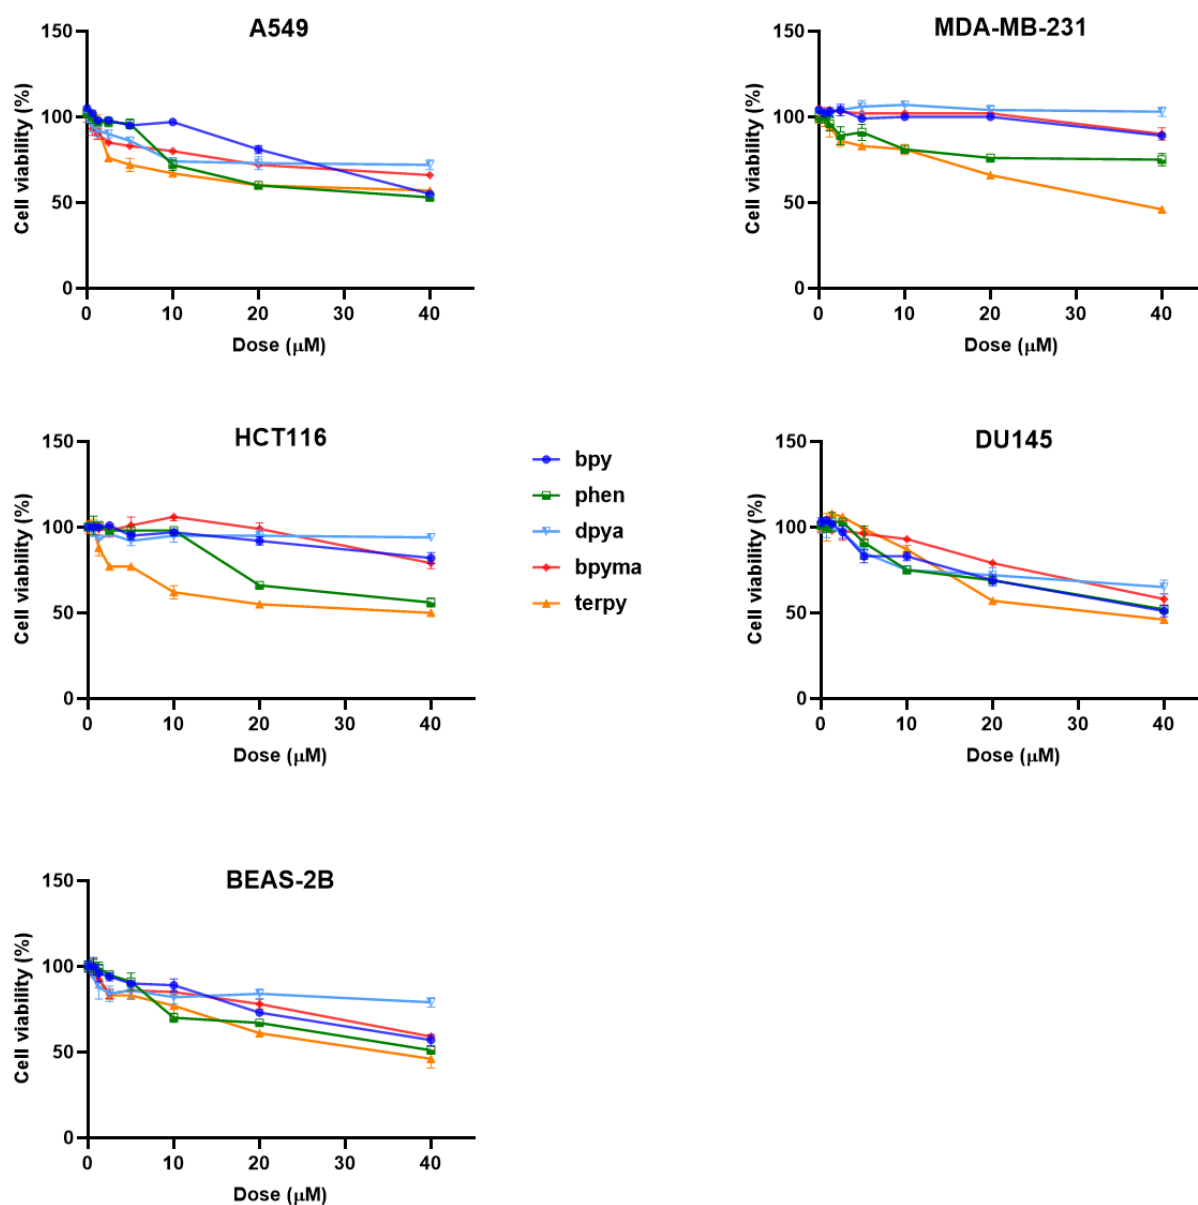

**Fig. S7b.** The dose-response graphics for bpy, phen, dpva, bpyma and terpy obtained from SRB assay, showing the effect of the complexes on the growth of the cell lines after 48 h of treatment. Results are represented as mean  $\pm$  standard deviation ( $n = 3$ ).

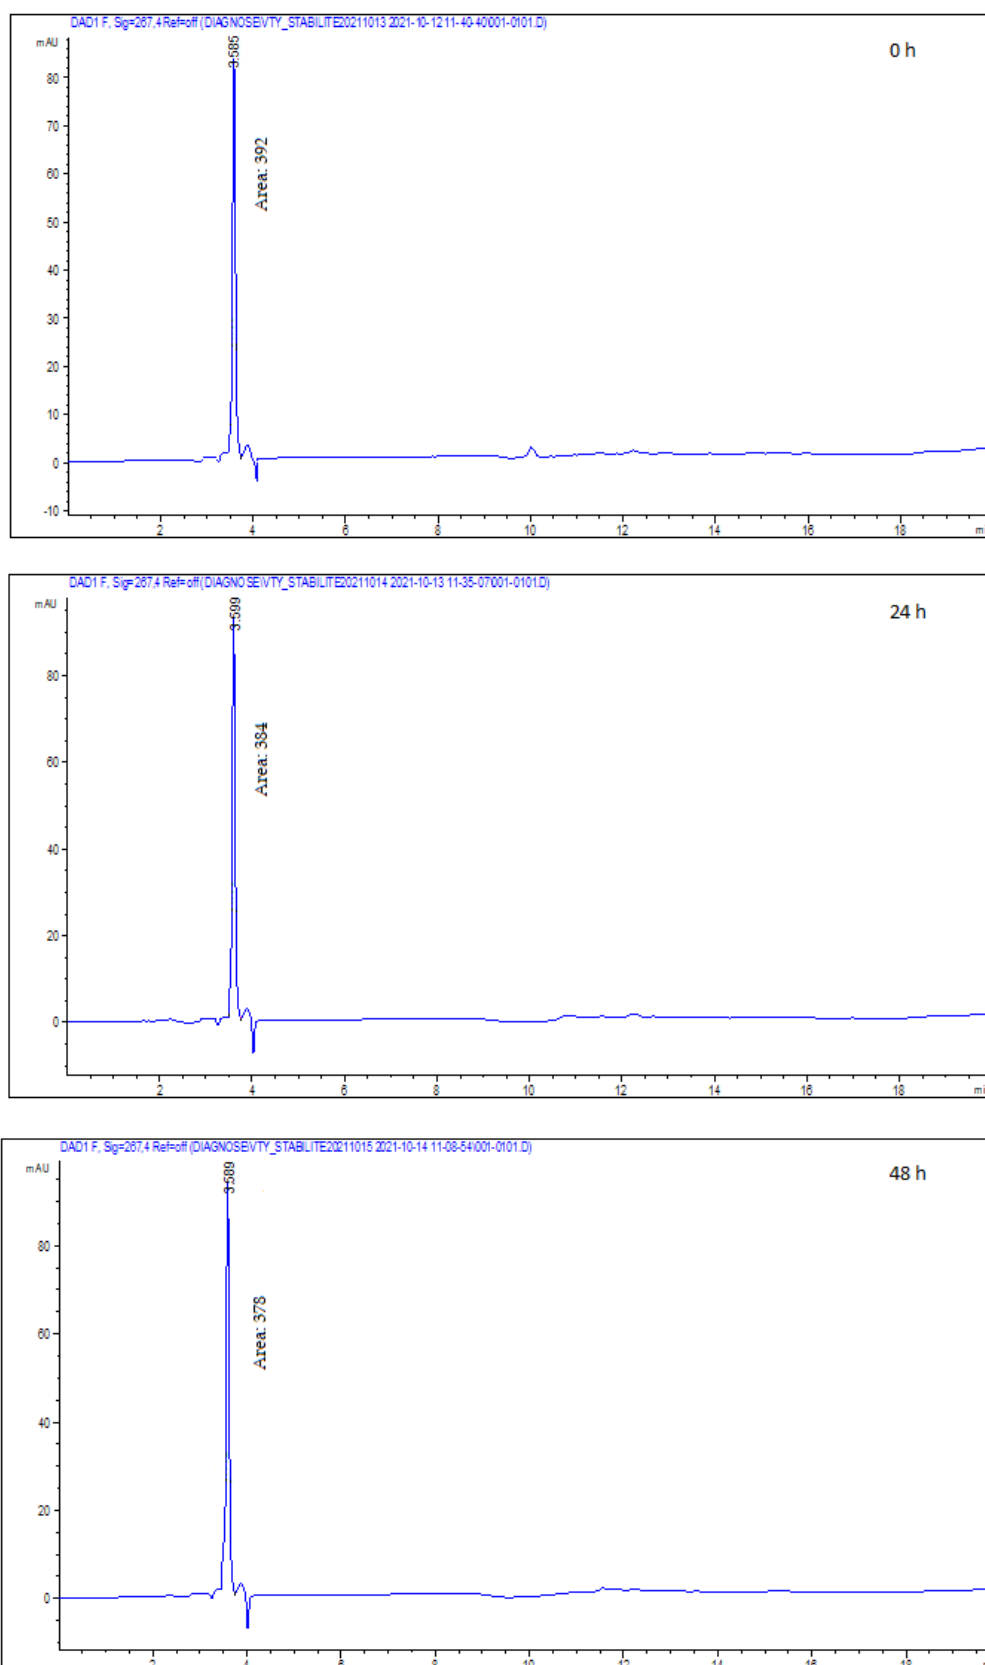

**Fig. S8.** Time-dependent stability of **4** (20  $\mu$ M) in saline measured by the reverse phase HPLC at 267 nm.

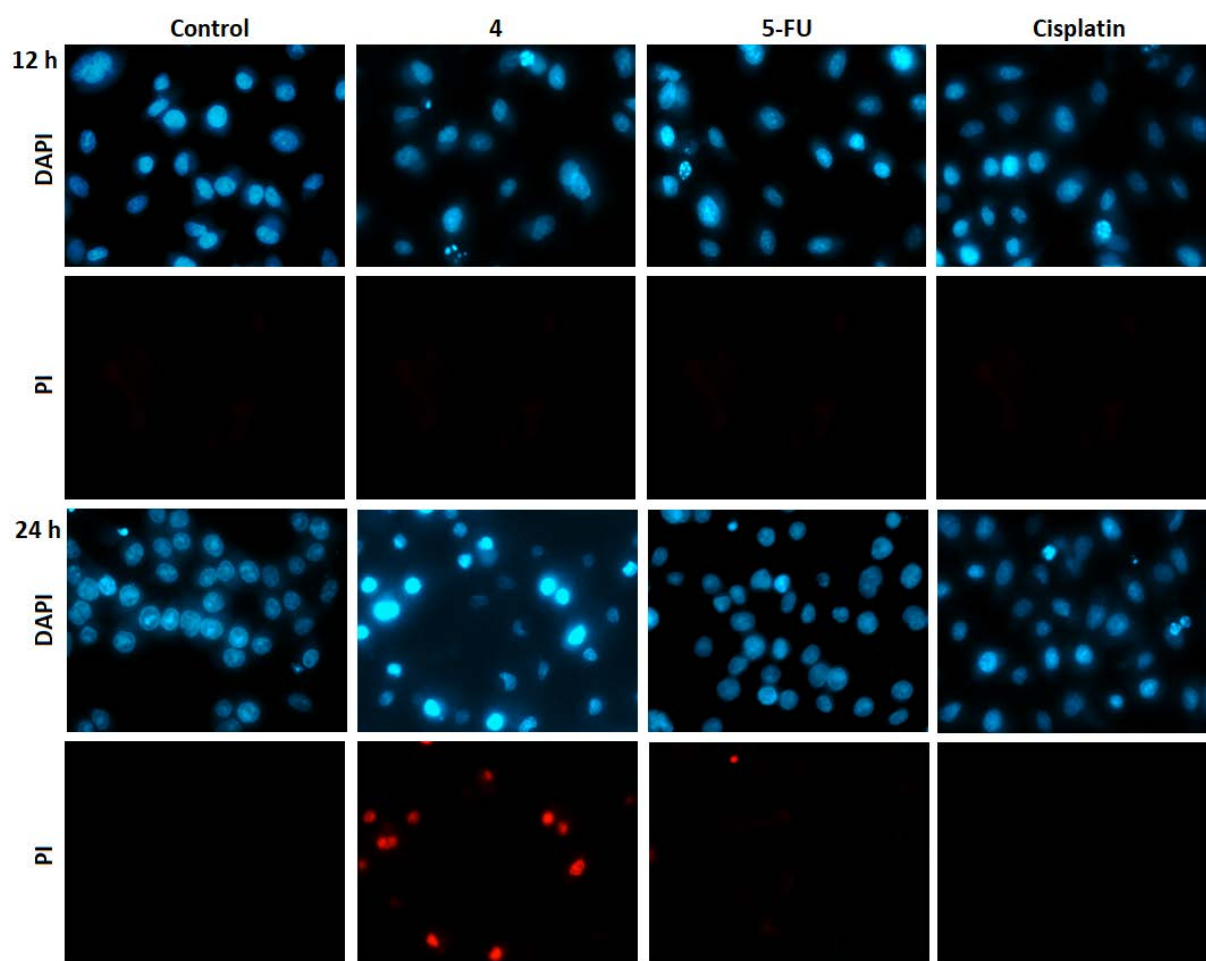

**Fig. S9.** Morphological changes in A549 cells treated with **4** (40  $\mu$ M), 5-FU (172  $\mu$ M) and cisplatin (33.9  $\mu$ M), respectively, for 12 and 24 h. Cells were stained with DAPI/PI followed by detection using a fluorescence microscope. DAPI stained the live cells with intact plasma membrane (blue fluorescence), while PI stained dead and apoptotic ones (red fluorescence) with disrupted plasma membrane. Magnification: 40 $\times$ .

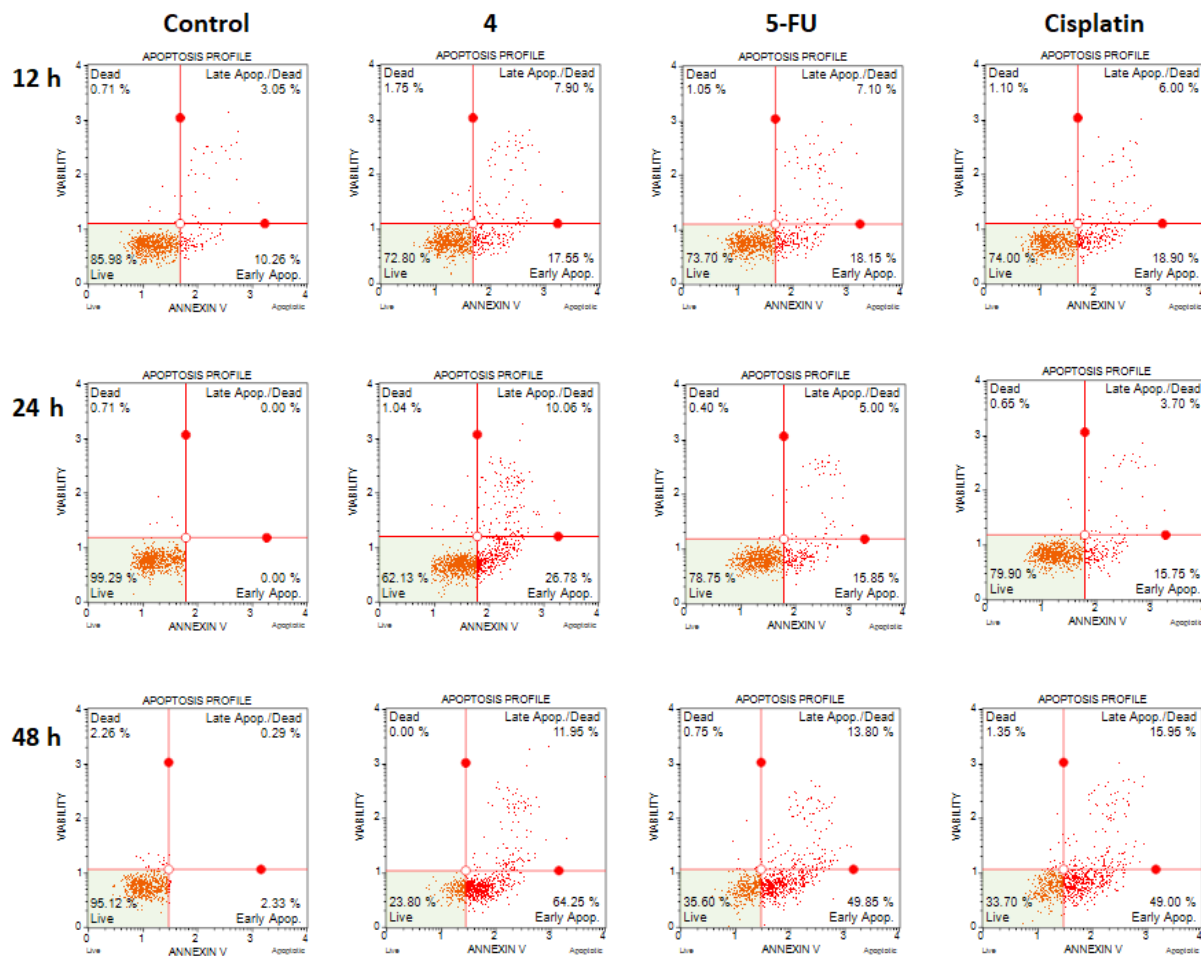

**Fig. S10.** Annexin-V/7-AAD staining assay. A549 cells treated with **4** (40  $\mu$ M), 5-FU (172  $\mu$ M) and cisplatin (33.9  $\mu$ M), respectively, for 12, 24 and 48 h. 5-FU and cisplatin were used as positive controls. The quadrants show populations for A549 cells in four stages treated by the compounds.



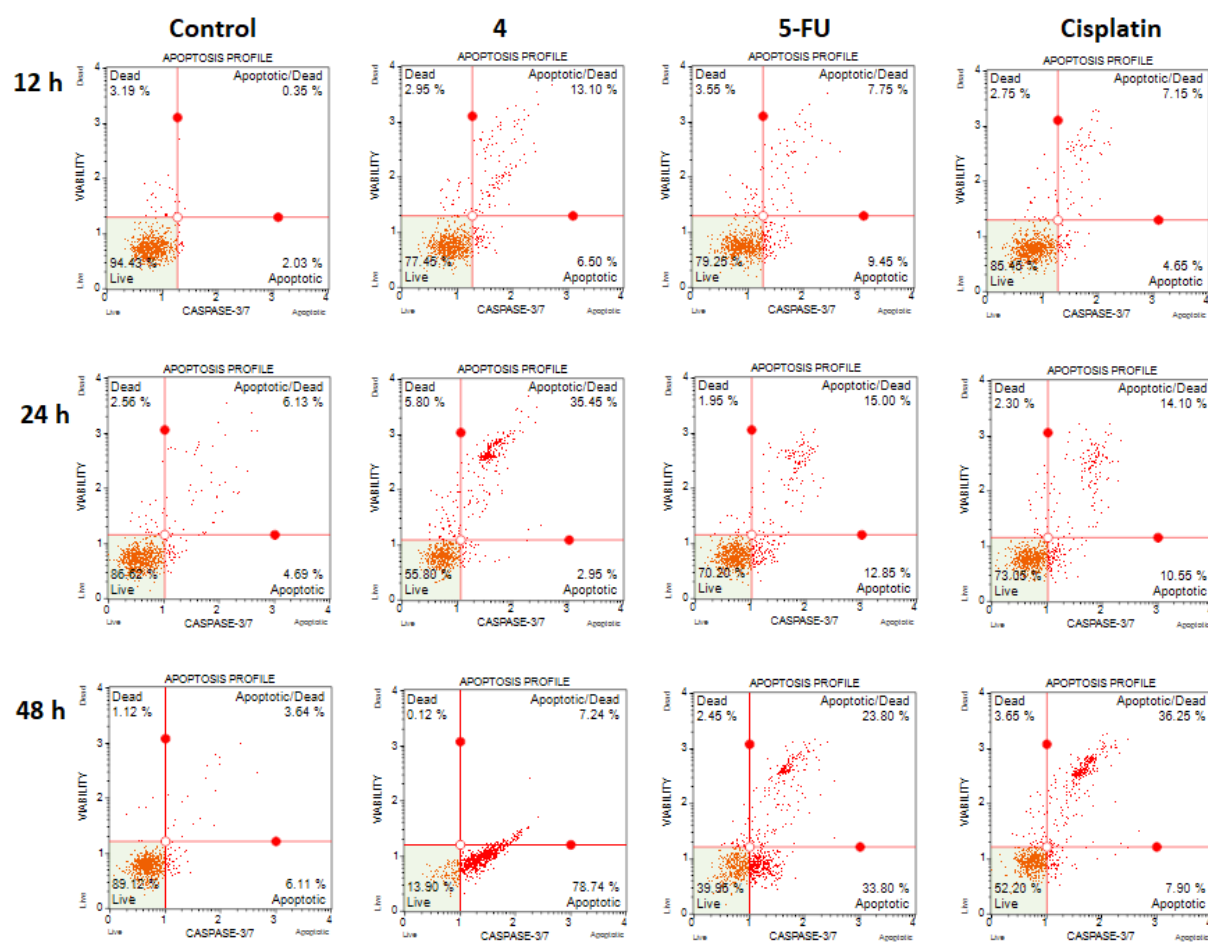

**Fig. S11.** Caspase 3/7 activity in A549 cells treated with **4** (40  $\mu$ M), 5-FU (172  $\mu$ M) and cisplatin (33.9  $\mu$ M), respectively, for 12, 24 and 48 h. 5-FU and cisplatin were used as positive controls. The quadrants show populations for A549 cells in four stages treated by the compounds.

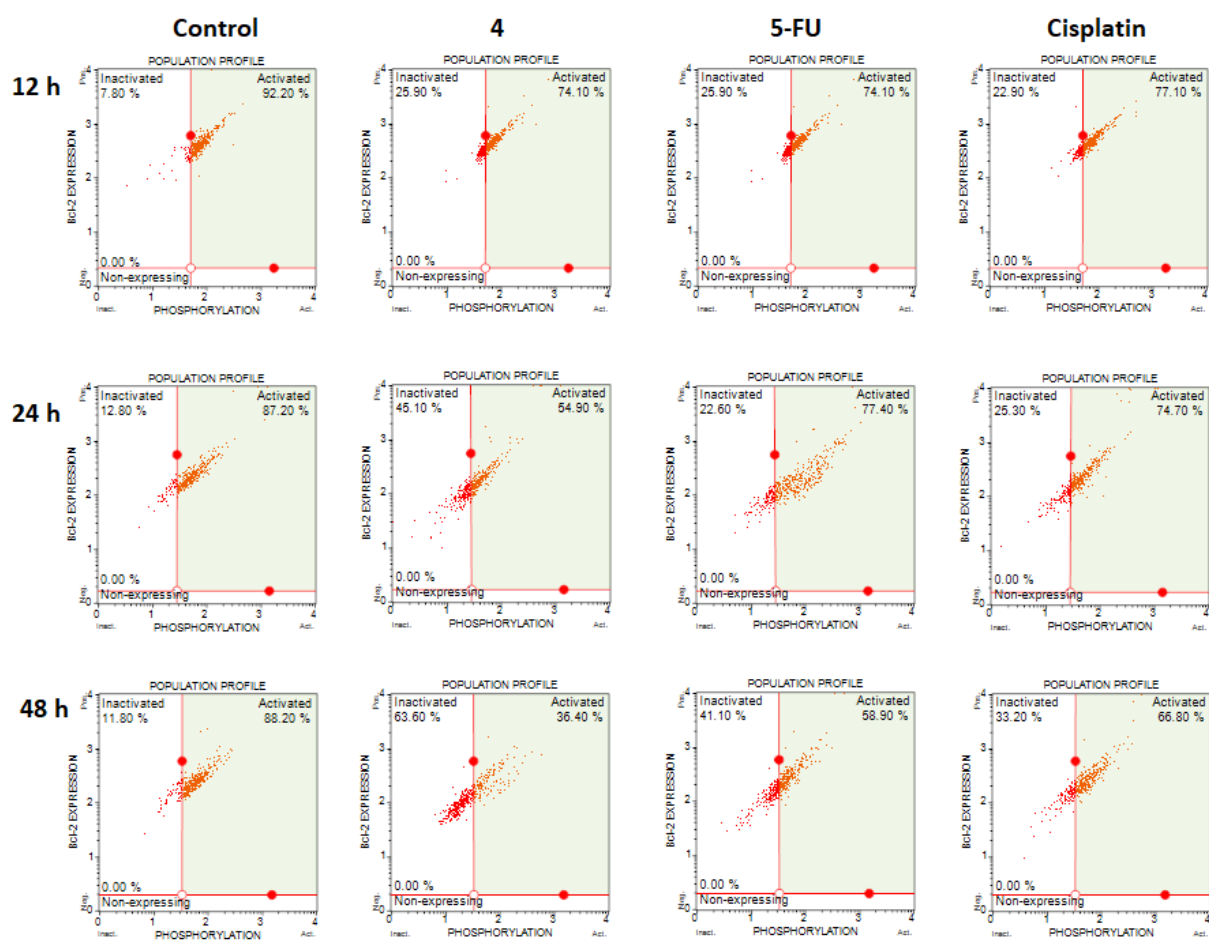

**Fig. S12.** Bcl2 expression in A549 cells treated with **4** (40  $\mu$ M), 5-FU (172  $\mu$ M) and cisplatin (33.9  $\mu$ M), respectively, for 12, 24 and 48 h. 5-FU and cisplatin were used as positive controls.

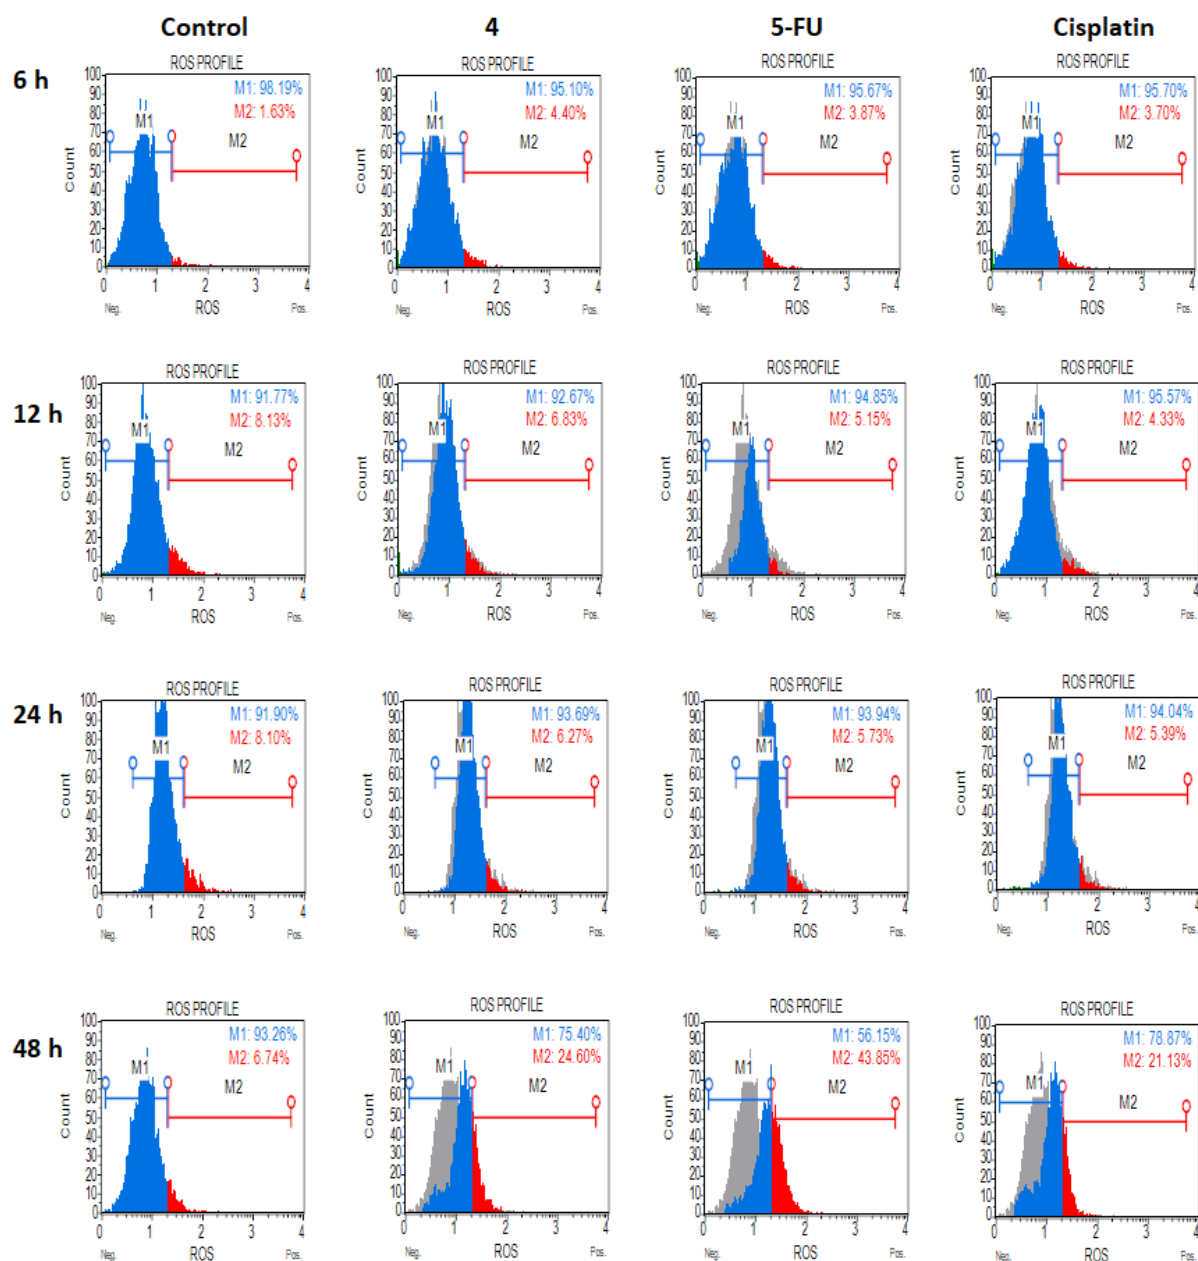

**Fig. S13.** ROS generation in A549 cells treated with **4** (40  $\mu$ M), 5-FU (172  $\mu$ M) and cisplatin (33.9  $\mu$ M), respectively, for 6, 12, 24 and 48 h. 5-FU and cisplatin were used as positive controls.

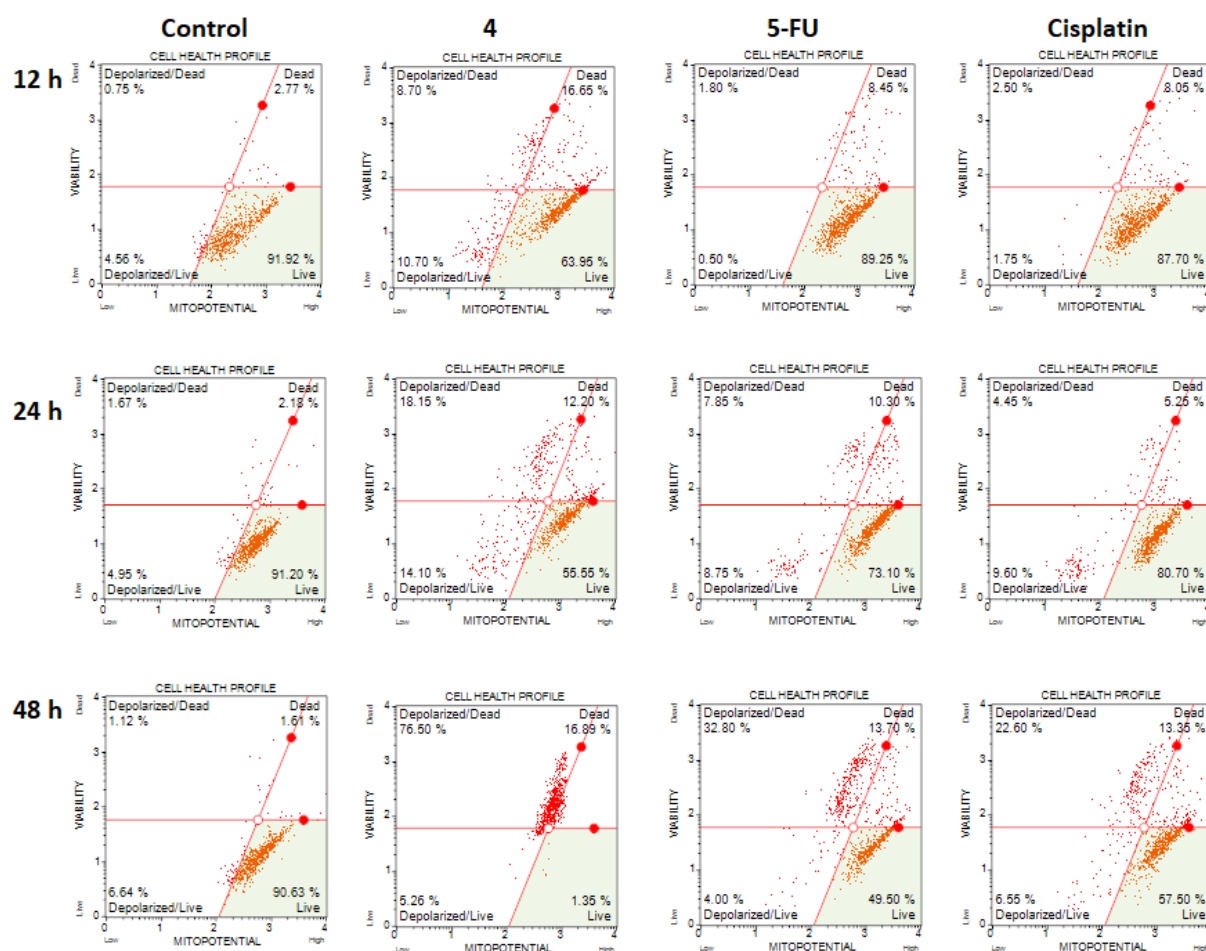

**Fig. S14.** Mitochondrial membrane depolarization in A549 cells treated with **4** (40  $\mu$ M), 5-FU (172  $\mu$ M) and cisplatin (33.9  $\mu$ M), respectively, for 12, 24 and 48 h. 5-FU and cisplatin were used as positive controls.

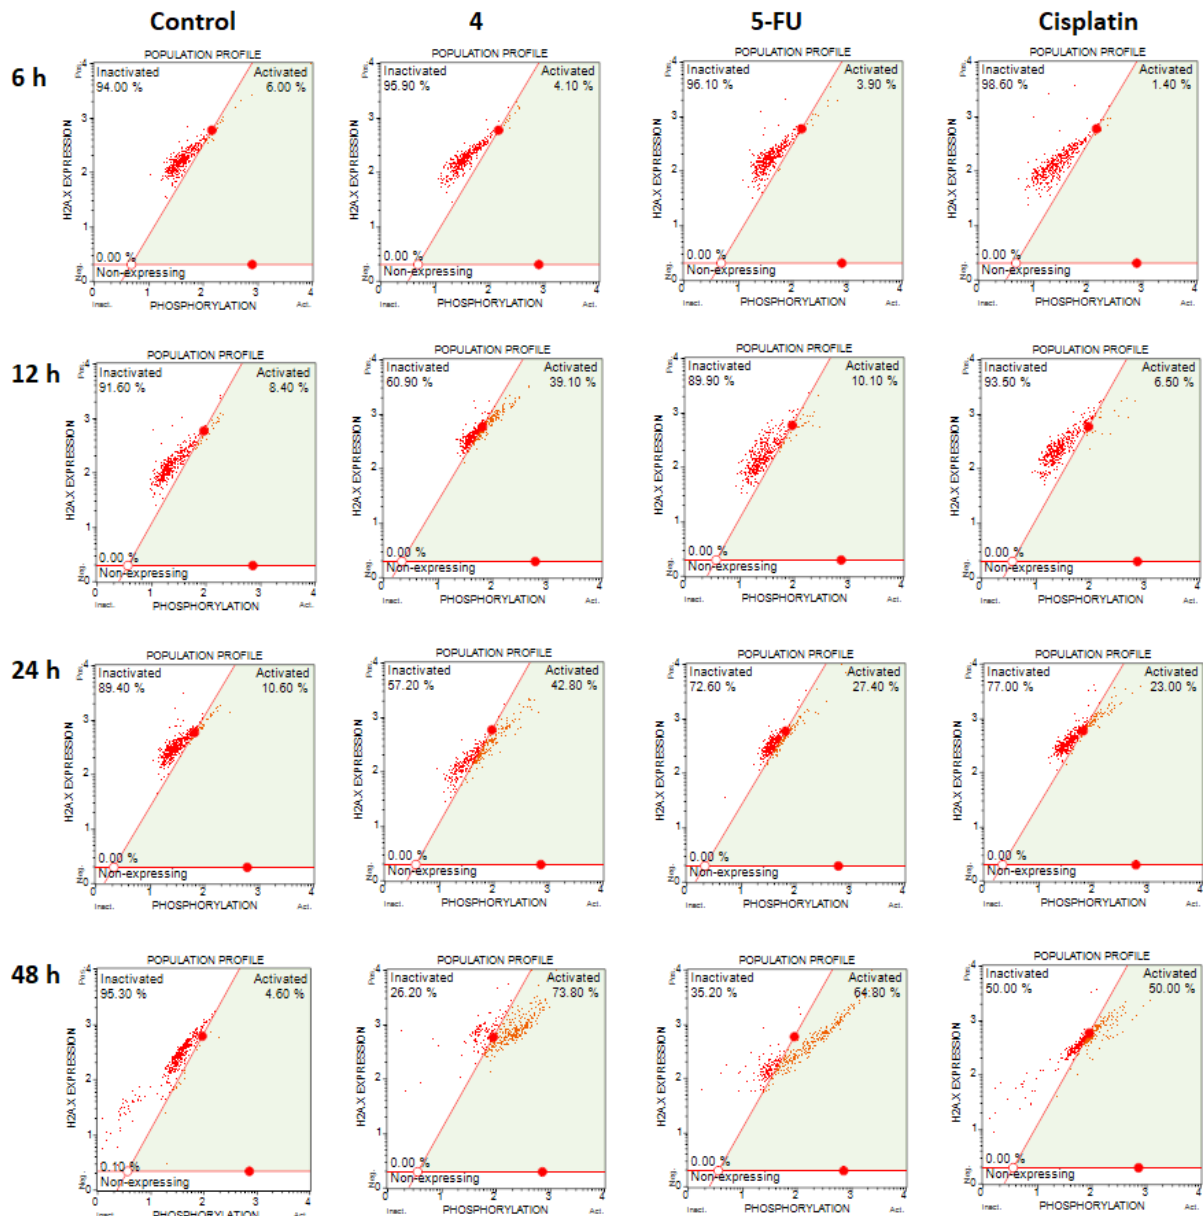

**Fig. S15.** Formation of DNA double-strand breaks in A549 cells treated with **4** (40  $\mu$ M), 5-FU (172  $\mu$ M) and cisplatin (33.9  $\mu$ M), respectively, for 6, 12, 24 and 48 h. 5-FU and cisplatin were used as positive controls.
